# Supplementary material
Source: PubMed Central journal article supplement (PMC8858875)

Supplementary Figure 1

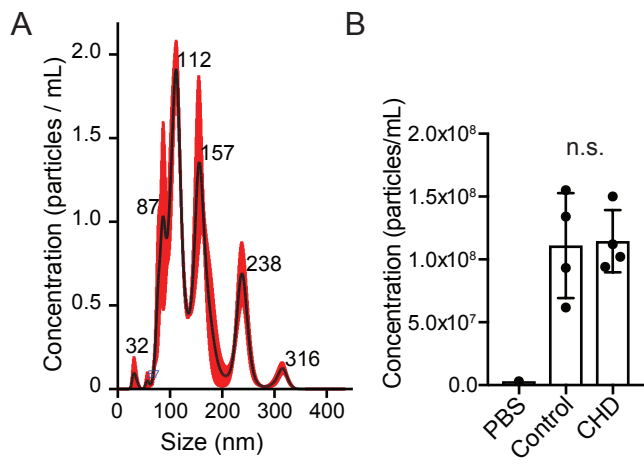

Supplement: NIHMS1764605-supplement-fS1.pdf [file NIHMS1764605-supplement-fS1.pdf]

Supp. Figure 2

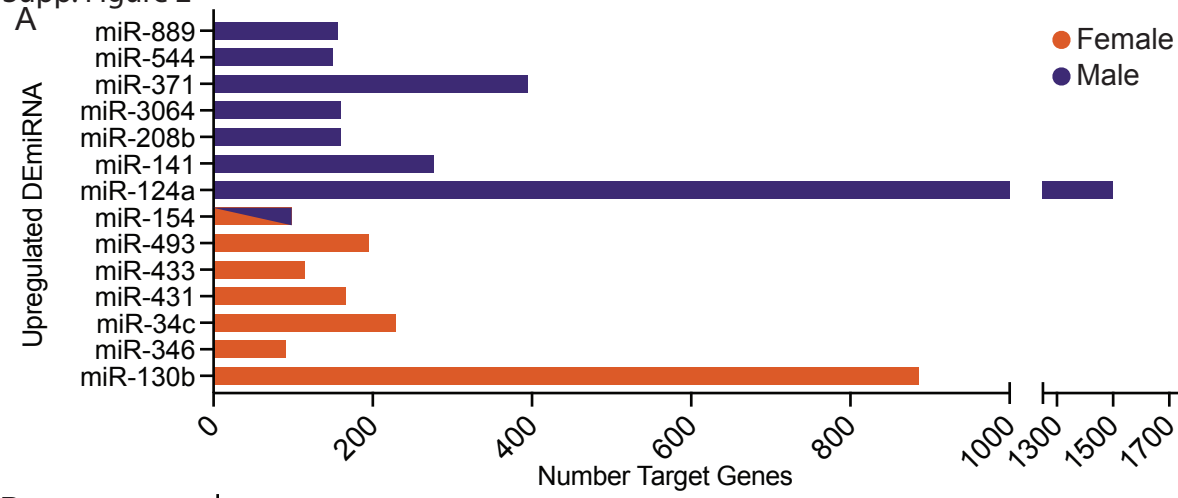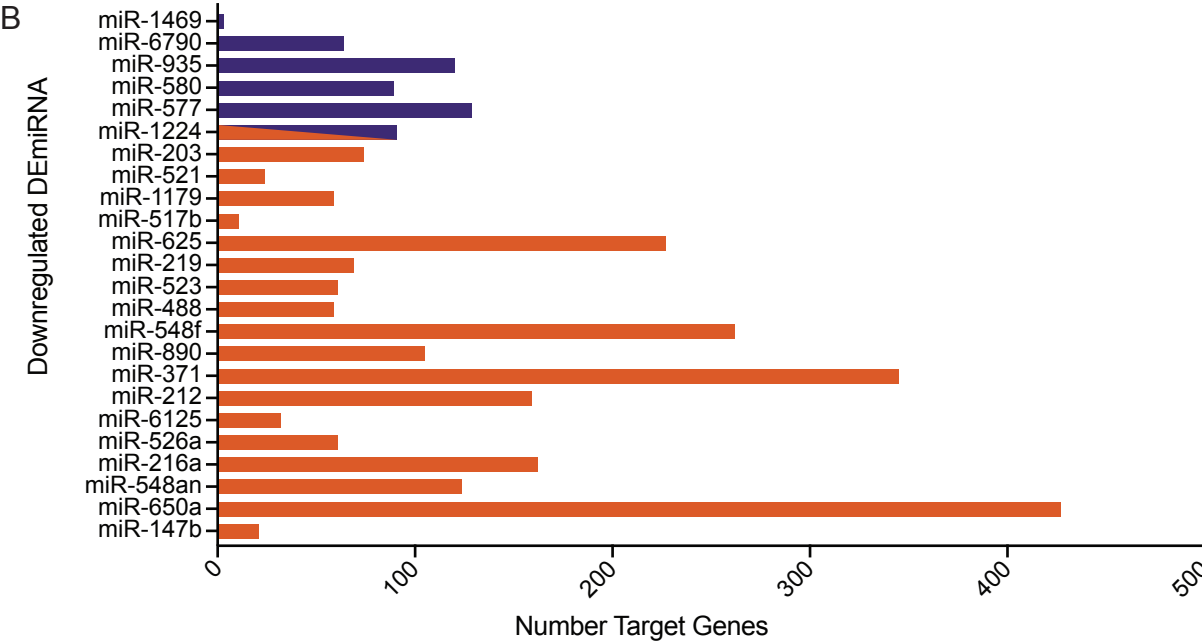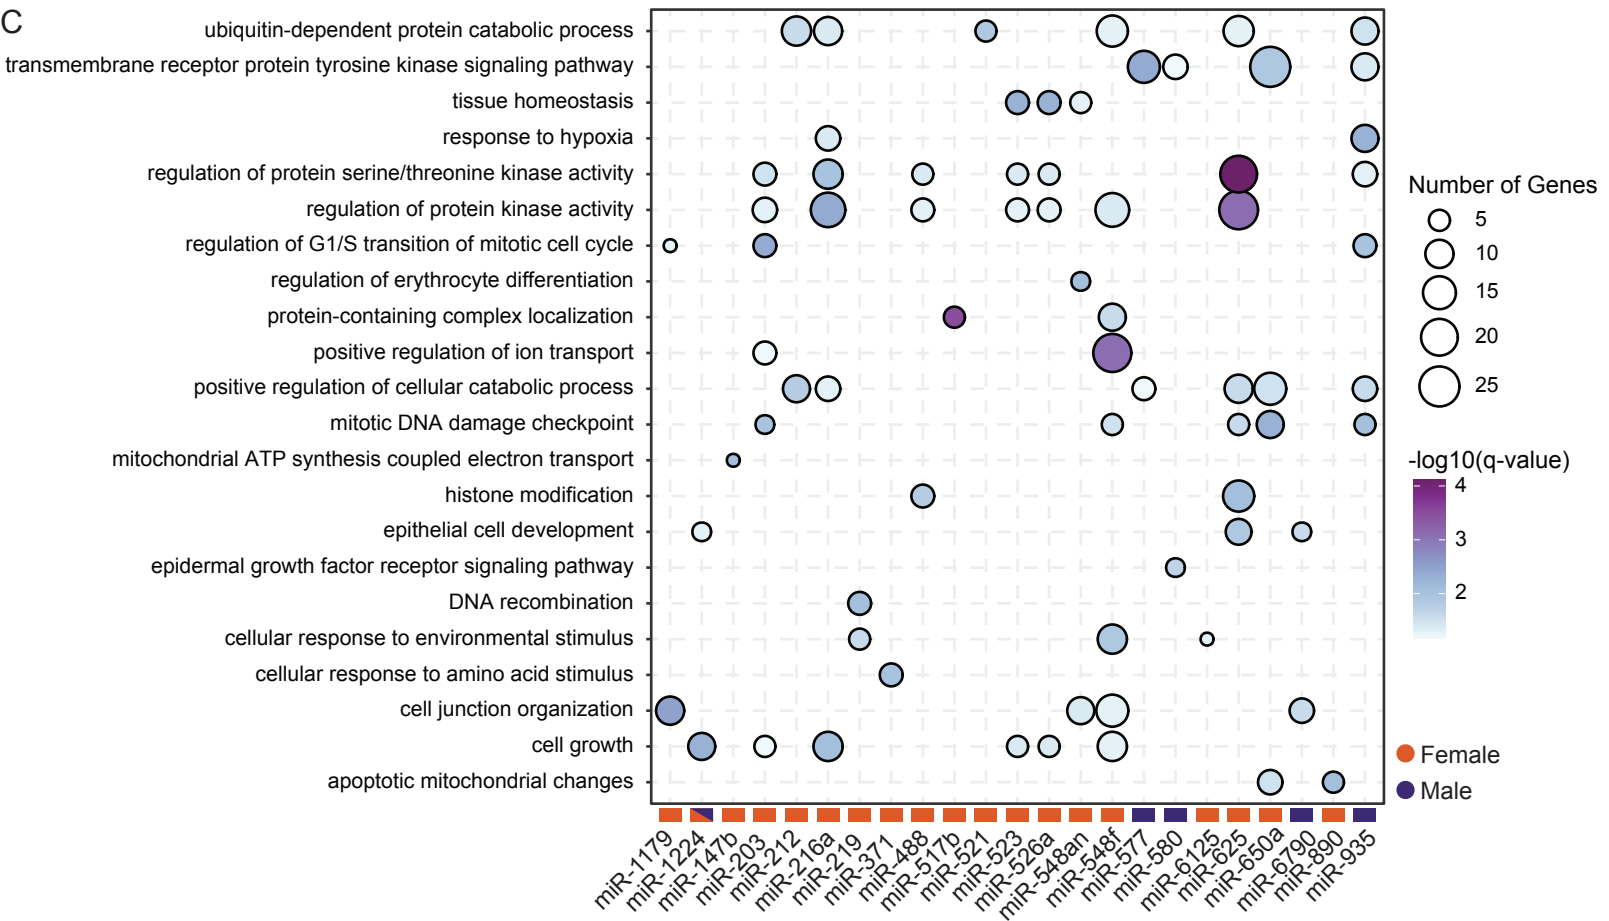

Supplement: NIHMS1764605-supplement-fS2.pdf [file NIHMS1764605-supplement-fS2.pdf]

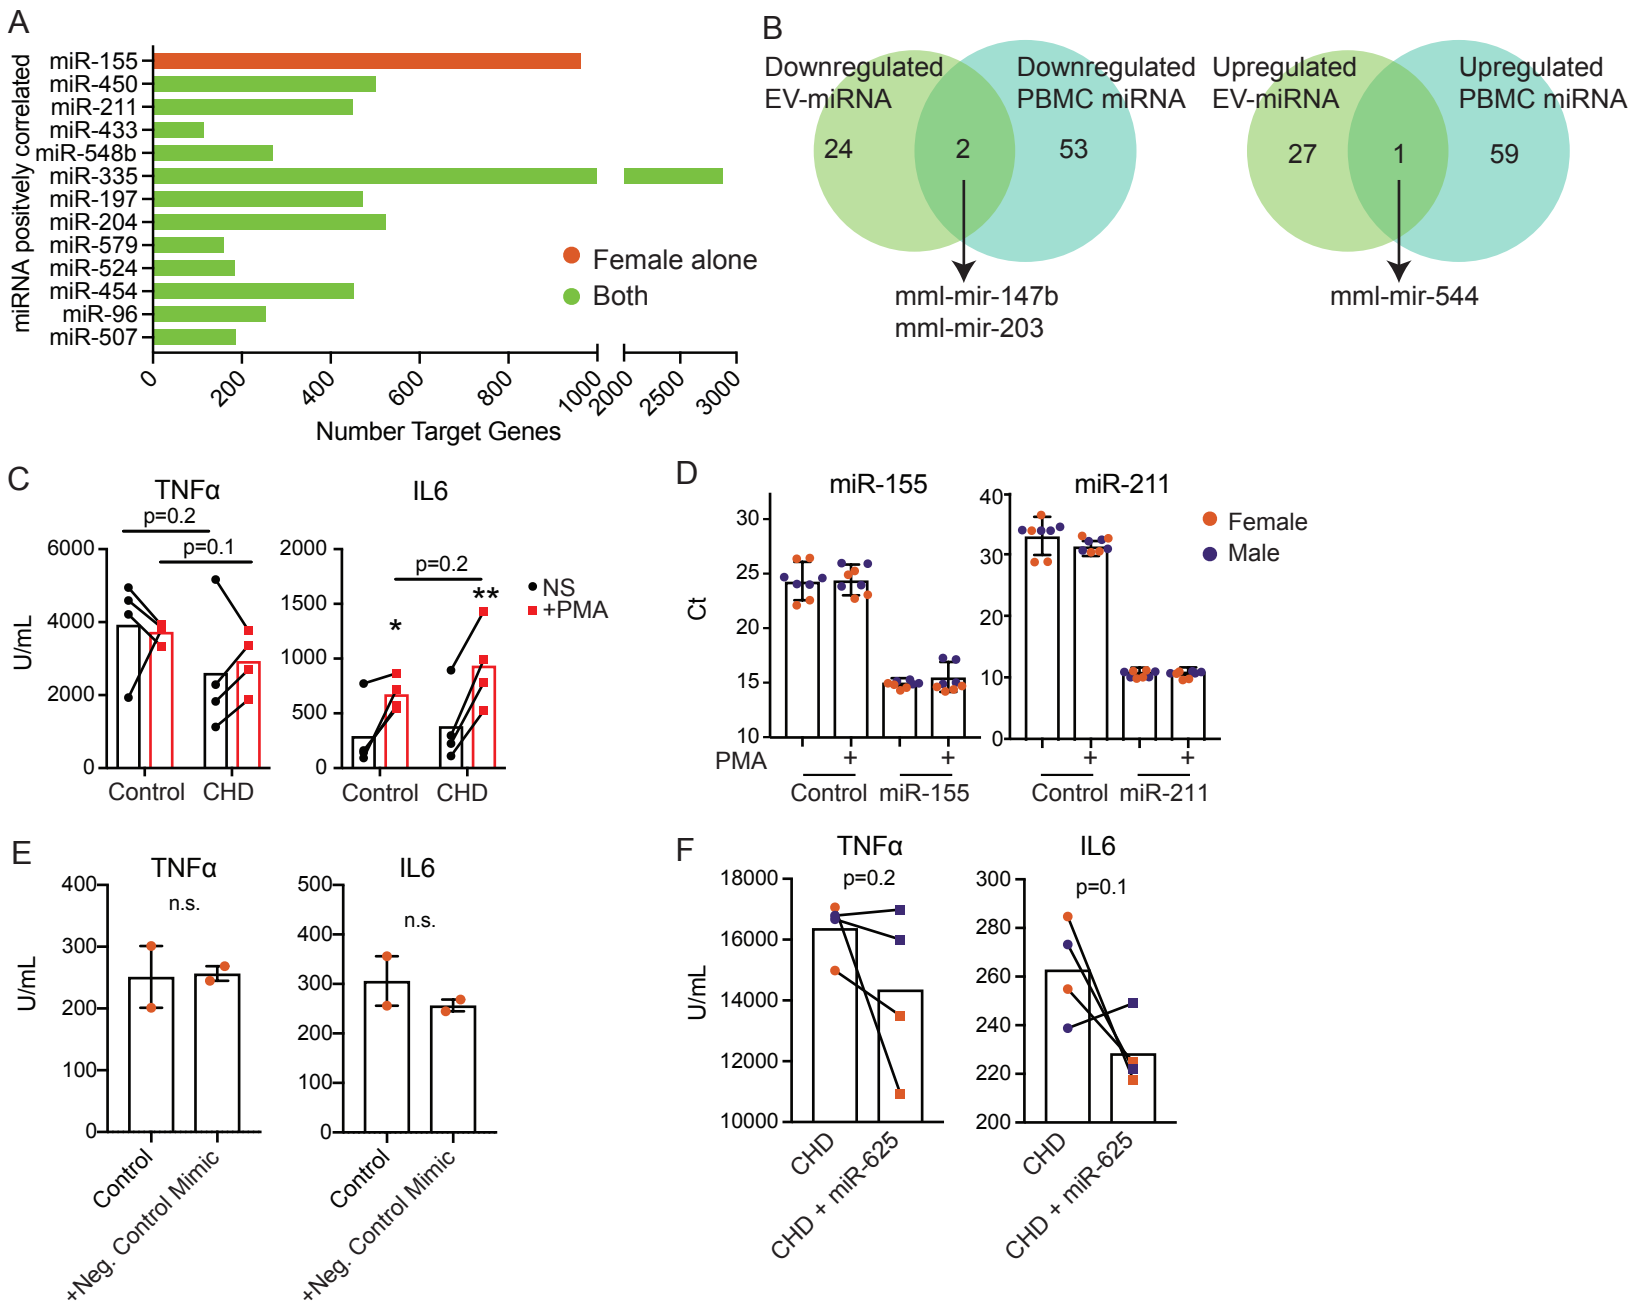

Supplement: NIHMS1764605-supplement-fS3.pdf [file NIHMS1764605-supplement-fS3.pdf]
